# Supplementary material for: The disability profile of primary health care users may vary depending on the type of care and musculoskeletal pain characteristics
Source: Research Square preprint supplement (doi:10.21203/rs.3.rs-1020664/v1), 2021-11-18
Supplement: Supplementary file 1 [file 250bbf2855a0359398eeb450.docx]

| **Table 1: Description of sociodemographic and clinical characteristics according to disability (n=668).** | | | | | | | | | | | |
| --- | --- | --- | --- | --- | --- | --- | --- | --- | --- | --- | --- |
|  |  | DISABILITY BY LEVEL | | |  |  |  | LINEAR  DISABILITY | |  |  |
| Sociodemographic and clinical characteristics | | None | Mild | Moderate | Severe | p |  | Continuous | | p |  |
|  |  | n (%) | n (%) | n (%) | n (%) |  | r | Median | IQR(25-75) |  | r |
| **Type of assistance care** | Family Health | 59(38.3) | 71(23.4) | 36(21.2) | 4(10.0) |  |  | 11.4 | 2.4 – 23.6 | | |
|  |  |  |  |  | **<0.001 *** |  |  |  | **<0.001*** |  |
|  | Health Center | 95(61.7) | 233(76.6) | 134(78.8) | 36(90.0) |  |  | 16.7 | 7.4 – 31.1 |  |  |
|  | 25 Percentile (18-32 years) | 30(19.6) | 85(28.6) | 36(22.1) | 9(22.5) |  |  | 16.3 | 8.4 – 26.7 | 0.0938** |  |
|  | 25-75 Percentile (33-58 years) | 83(54.2) | 129(43.4) | 96(58.9) | 23(57.5) |  |  | 16.7 | 4.8 – 31.1 |  |  |
|  |  |  |  | 0.2347** |  |  |  |  |  |
| **Age (years)** | 75-99 Percentile (>58 years) | 40(26.1) | 83(27.9) | 31(19.0) | 8(20.0) |  |  | 13.0 | 5.0 – 24.6 |  |  |
|  | average (SD) | 47.5 (15.6) | 46.4 (18.0) | 44.9 (15.3) | 46.5 (14.6) | 0.1562*** | -0.05 | 15.5 | 5.7 – 29.2 | 0.0614*** | -0.07 |
| **Gender** | Male | 47(30.5) | 85(28.0) | 39(22.9) | 12(30.0) | 0.2227* |  | 14.4 | 4.6 – 26.5 | 0.2765* |  |
|  | Female | 107(69.5) | 219(72.0) | 131(77.1) | 28(70.0) |  | 15.8 | 5.9 – 29.9 |  |
| **Work?** | No | 41(26.6) | 117(38.5) | 51(30.0) | 12(30.0) | 0.7799* |  | 15.1 | 6.5 – 27.5 | 0.6473* |  |
|  | Yes | 113(73.4) | 187(61.5) | 119(70.0) | 28(70.0) |  | 15.9 | 4.9 – 30.9 |  |

Superior members of government and private companies, science and arts professionals

| 20(17.7) | 26(14.0) | 16(13.6) | 3(11.1) |  | 14.0 | 4.0 – 27.4 |  |
| --- | --- | --- | --- | --- | --- | --- | --- |
| 11(9.7) | 36(19.5) | 12(10.2) | 4(14.8) | 0.7786** | 14.6 | 8.0 – 25.6 | 0.8949** |
| 67(59.3) | 111(60.0) | 73(61.9) | 17(63.0) |  | 16.3 | 4.9 – 31.1 |  |
| 15(13.3) | 12(6.5) | 17(14.4) | 3(11.1) |  | 17.3 | 3.2 – 34.7 |  |

**Occupation**

Mid-level technicians and administrative service workers

Service workers and self-employed

Industry workers, repair, and maintenance

**Marital status** No spouse 94(61.0) 200(65.8) 110(64.7) 23(57.5) 0.8396* 15.6 6.0 – 29.1 0.8724*

With spouse 60(39.0) 104(34.2) 60(35.3) 17(42.5) 15.4 5.0 – 29.4

| **Skin color** | Non-white | 96(62.3) | 197(64.8) | 111(65.3) | 25(62.5) 15.8 6.2 – 29.2  0.7005* 0.5286* | | | | |
| --- | --- | --- | --- | --- | --- | --- | --- | --- | --- |
|  | White | 58(37.7) | 107(35.2) | 59(34.7) | 15(37.5) |  | 14.4 | 5.3 – 29.2 |  |
| **Education** | No education and less than 1 year of study  Elementary school or | 4(2.6)  54(35.1) | 12(3.9)  87(28.6) | 7(4.1)  66(38.8) | 3(7.5)  13(32.5) |  | 15.2  16.0 | 6.7 – 32.1  5.1 – 31.5 |  |
|  | equivalent |  |  |  |  | 0.5102** |  |  | 0.8738** |
|  | High school or equivalent | 72(46.7) | 160(52.6) | 75(44.1) | 19(47.5) |  | 15.4 | 6.7 – 27.4 |  |

| Higher Education/ | 24(15.6) | 45(14.8) | 22(12.9) | 5(12.5) |  | 14.4 | 4.9 – 27.0 |  |
| --- | --- | --- | --- | --- | --- | --- | --- | --- |
| Postgraduate |  |  |  |  |  |  |  |
| 1st Quintile | 26(21.5) | 34( 15.0 ) | 33(28.2) | 6(21.4) |  | 19.5 | 4.8 – 31.8 |  |
| 2nd Quintile | 18(14.9) | 53(23.3) | 24( 20.5 ) | 8 (28.6) |  | 17.8 | 7.8 – 30.1 |  |
| 3rd Quintile | 27( 22.3) | 61(26.9 ) | 31(26.5) | 4( 14.3) | 0.1710** | 14.3 | 5.3 – 27.6 | 0.0727** |
| **Per capita income** 4th Quintile | 23(19.0 ) | 33(14.5) | 13(11.1) | 5(17.9) |  | 11.5 | 3.3 – 22.8 |  |
| **(Reals)**  5th Quintile | 27(22.3) | 46( 20.3 ) | 16(13.7) | 5(17.9) |  | 13.5 | 3.7 – 21.9 |  |

average (SD) 1.354 (2.073) 1.169(1.046) 957 (828) 1.015(763) 5.7 – 29.2 **0.0068*****

|  | | | | | | **0.0197***** | -0.10 | 15.5 |  | -0.12 |
| --- | --- | --- | --- | --- | --- | --- | --- | --- | --- | --- |
| **Religion** | Does not haveA | 18(11.7) | 47(15.5) | 31(18.2) | 13(32.5) |  |  | 19.3 | 9.0 – 36.9 |  |

CatholicB 95(61.7) 154(50.8) 91(53.5) 14(35.0)

**0.0284****

| Evangelic AB | 31(20.1) | 72(23.8) | 34(20.0) | 8(20.0) | 16.1 | 5.5 – 26.2 |
| --- | --- | --- | --- | --- | --- | --- |
| Others AB | 10(6.5) | 30(9.9) | 14(8.2) | 5(12.5) | 14.4 | 8.2 – 36.2 |

14.3 4.4 – 27.5

**0.0328****

**Musculoskeletal Pain**

No 101(65.6) 127(41.8) 43(25.3) 3(7.5)

**<0.001***

9.4 1.7 – 19.3

**<0.001***

Yes 53(34.4) 177(58.2) 127(74.7) 37(92.5) 20.5 10.0 – 33.7

**Prevalence % (CI95%)**

23.0%(20.0%-

26.4%)

45.5%(41.8%- 25.4%(22.3%- 6.0%(4.4%-

49.3%)

28.9%)

8.0%)

**Legends:** n= number of users, SD= standard deviation, CI95%= 95% confidence interval, IQR= interquartile interval, * Umann-Whitney test, **kruskal wallis and Dunn's post-test, *** Spearman's correlation. A, B= Equal letters indicate that there was no significance between the groups. Disability levels= none (0-4.9); mild (5-24.9); moderate (25-49.9); severe (50-95.9). Per capita income = 1st Quintile (R$ 0-475/USD 0-91); 2nd Quintile (R$ 476-700/USD 92-134); 3rd Quintile (R$ 701-1000/USD 135-192); 4th Quintile (R$ 1001-1500/USD 193-289); 5th Quintile (>R$ 1500/>USD 289).
