# Supplementary material for: The disability profile of primary health care users may vary depending on the type of care and musculoskeletal pain characteristics
Source: Research Square preprint supplement (doi:10.21203/rs.3.rs-1020664/v1), 2021-11-18
Supplement: Supplementary file 2 [file 92746f7d4180e13d607cc6c1.docx]

**Table 3: Multivariate nonparametric regression estimate between disability and sociodemographic and clinical characteristics (n=668).**

**Sociodemographic and clinical characteristics Disability**

|  | | Estimated (CI95%) | p |
| --- | --- | --- | --- |
| **Type of assistance care** | Family Health  Health Center | **Ref**  5.5 (2.6; 8.4) | **<0.001** |
| **Age (years)** | Continuous | -0.08 (-0.16; -0.002) | **0.034** |
| **Per capita income** | 1st Quintile | **Ref** |  |
|  | 2nd Quintile | -1.5 (-2.7; -0.3) | **0.014** |
|  | 3rd Quintile | -2.4 (-4.6; -0.4) | **0.019** |
|  | 4th Quintile | -3.5 (-6.7; -0.4) | **0.023** |
|  | 5th Quintile | -5.0 (-9.2; -0.9) | **0.013** |
| **Religion** | Does not have | **Ref** |  |
|  | Catholic | -2.7 (-7.5; 1.7) | 0.232 |
|  | Evangelic | -4.0 (-9.0; 1.1) | 0.115 |
|  | Others | -1.4 (-8.4; 5.2) | 0.670 |
| No  **Musculoskeletal Pain**  Yes | | **Ref**  11.2 (8.5; 13.9) | **<0.001** |

r2=0.1529 Per capita income = 1st Quintile (R$ 0-475/USD 0-91); 2nd Quintile (R$ 476-700/USD 92-134); 3rd Quintile (R$ 701-1000/USD 135-192); 4th Quintile (R$ 1001-1500/USD 193-289); 5th Quintile (>R$ 1500/>USD 289). CI95%= 95% confidence interval. Bootstrap for 1000 reps.
