# Supplementary material for: The disability profile of primary health care users may vary depending on the type of care and musculoskeletal pain characteristics
Source: Research Square preprint supplement (doi:10.21203/rs.3.rs-1020664/v1), 2021-11-18
Supplement: Supplementary file 4 [file b8c42f66a8a3eefce610b691.docx]

**Table 2: Description of sociodemographic and clinical characteristics in individuals with musculoskeletal pain according to disability (n=394)**

Sociodemographic and clinical characteristics

|  | Median | IQR(25-75) | r |
| --- | --- | --- | --- |
| **Type of assistance** Family Health | 16.4 | 5.9 – 27.8 | **0.0063*** |
| **care** Health Center | 21.8 | 10.7 – 35.2 |  |
| 25 Percentile (18-32 years)A | 21.4 | 12.5 – 33.7 |  |
| 25-75 Percentile (33-58 years)A | 23.6 | 10.1 – 35.8 | **0.0126**** |
| **Age (years)** |  |  |  |
| 75-99 Percentile (>58 years)B | 15.3 | 6.9 – 29.4 |  |
| Continuous | 20.6 | 10.0 – 33.7 | **0.0089***** -0.13 |
| **Gender** Male | 20.4 | 11.3 – 29.6 | 0.7263* |
| Female | 20.6 | 9.3 – 35.0 |  |
| **Work?** No | 16.5 | 8.1 – 29.9 | 0.0665* |
| Yes | 22.4 | 10.1 – 36.2 |  |

DISABILITY

Continuous p

|  | Superior members of government and private companies, science and arts professionals | 20.6 | 8.2 – 29.6 |  |
| --- | --- | --- | --- | --- |
|  | Mid-level technicians and administrative service workers | 22.8 | 10.0 – 33.6 |  |
| **Occupation** |  |  | 0.7263** |
|  | Service workers and self-employed | 22.0 | 10.1 – 36.4 |  |
|  | Industry workers, repair, and maintenance | 29.2 | 15.6 – 41.5 |  |
| **Marital status** | No spouse | 20.6 | 10.0 – 34.0 | 0.9075* |
|  | With spouse | 20.4 | 10.0 – 33.5 |  |
| **Skin color** | Non-white | 21.7 | 10.1 – 33.6 | 0.4872* |
|  | White | 19.6 | 9.9 – 35.0 |  |
|  | No education and less than 1 year of study | 24.2 | 10.8 – 37.7 |  |
| **Education** |  |  |  |  |
|  | Elementary school or equivalent | 20.6 | 10.2 – 35.1 | 0.8043** |
|  | High school or equivalent | 20.5 | 10.0 – 33.8 |  |

Higher Education/

| Postgraduate | |  | | | |
| --- | --- | --- | --- | --- | --- |
| 1st Quintile | | 25.2 | 10.0 – 35.6 |  |  |
| 2nd Quintile | | 22.6 | 13.8 – 40.1 |  |  |
| 3rd Quintile | | 16.5 | 9.9 – 29.3 | 0.1200** |  |
| **Per capita income**  4th Quintile | | 14.4 | 8.2 – 28.5 |  |  |
| 5th Quintile | | 15.9 | 7.5 – 27.4 |  |  |
| Continuous | | 20.6 | 10.0 – 33.7 | 0.0587*** | -0.11 |
| Does not have | | 22.8 | 10.4 – 40.7 |  |  |
| **Religion** | Catholic Evangelic | 20.3  20.3 | 9.5 – 32.2 0.1273**  9.3 – 32.1 | | |
|  | Others | 21.5 | 9.2 – 40.1 | | |
| **Intensity** | (0-10) | 20.6 | 10.0 – 33.7 **<0.001***** 0.38 | | |
| **Frequency (days per week)** | 1- 2A | 14.3 | 6.7 – 27.4 | | |
|  | 3 -5AB | 22.1 | **0.0045****  11.2 – 31.7 | | |
|  | 6- 7B | 22.1 | 11.2 – 36.9 | | |

20.5 9.0 – 30.5

**(Reals)**

| **Region** | spíneA | 20.2 | 9.2 – 32.1 |  |
| --- | --- | --- | --- | --- |
|  | ULB | 10.3 | 4.2 – 21.2 |  |
|  | LLAB | 16.0 | 9.4 – 28.9 | **0.0001**** |
|  | + pain regionsC | 29.0 | 15.8 – 42.1 |  |
| **Number of sites** | 1 siteA | 15.6 | 6.9 – 27.9 |  |
|  | 2 sitesB | 25.5 | 16.3 – 40.5 | **0.0001**** |
|  | 3 or more sitesAB | 31.0 | 15.5 – 44.5 |  |
| **Duration (months)** | <6 months | 20.6 | 9.7 – 36.2 | 0.8474* |
|  | >6 months | 20.4 | 10.0 – 33.5 |  |

**Legends:** n= number of users, IQR= interquartile range, *mann-Whitney U test, **kruskal wallis and Dunn's post-test, ***Spearman correlation. A, B, C= Equal letters indicate that there was no significance between the groups. Per capita income = 1st Quintile (R$ 0-475/USD 0-91); 2nd Quintile (R$ 476-700/USD 92-134); 3rd Quintile (R$ 701-1000/USD 135-192); 4th Quintile (R$ 1001-1500/USD 193-289); 5th Quintile (>R$ 1500/>USD 289).UL=upper limbs. LL=lower limbs.
